# See and Hear What the Field Is Discussing!

*Psychiatric Services* features research related to the delivery of mental health services, especially for people with serious mental illness in community-based treatment programs. Provision of high-quality care involves collaboration among a variety of professionals. Clinicians, administrators, and policy makers look to *Psychiatric Services* for research on how to deliver evidence-based treatments, to take an integrated “whole-health” approach to care, and to better engage individuals in their care. Mental health’s current focus on patient-centered, recovery-oriented care and on dissemination of evidence-based practices is transforming service delivery systems at all levels. Research published in *Psychiatric Services* contributes to this transformation.

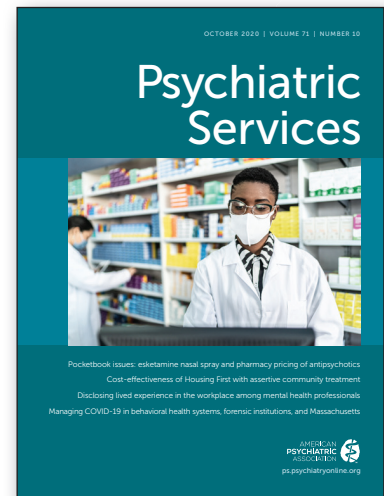

## Our Most Talked About Articles so far in 2020:

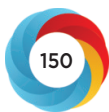

### Augmenting Evidence-Based Care With a Texting Mobile Interventionist: A Pilot Randomized Controlled Trial

Published online July 7, 2020

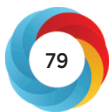

### Cost-Effectiveness of Esketamine Nasal Spray for Patients With Treatment-Resistant Depression in the United States

Published online July 7, 2020

## Dive Deeper With “From Pages to Practice” Podcast

Editor Lisa Dixon, M.D., M.P.H., and Podcast Editor and co-host Josh Berezin, M.D., M.S., discuss the latest mental health services research published in *Psychiatric Services* and why it is relevant. Topics include community-based treatment programs, collaborative care, evidence-based treatment and service delivery, criminal and social justice, policy analysis, and more.

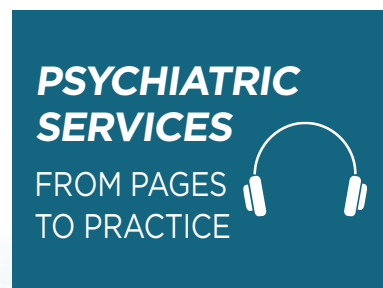

### August 2020: Mental Health Disparities by Race and Ethnicity

Ayana Jordan, M.D., Ph.D., joins Dr. Dixon and Dr. Berezin to discuss disparities in initiation of and engagement in mental health care among persons from racial-ethnic minority groups.

### October 2020: Smartphone Apps for College Mental Health

John Torous, M.D., M.B.I., joins Dr. Dixon and Dr. Berezin to discuss the expanded access to smartphone apps for mental health on college campuses as well as issues regarding the privacy, efficacy, and quality of mental health apps.
