DECEMBER 2020 | VOLUME 71 | NUMBER 12

# Psychiatric Services

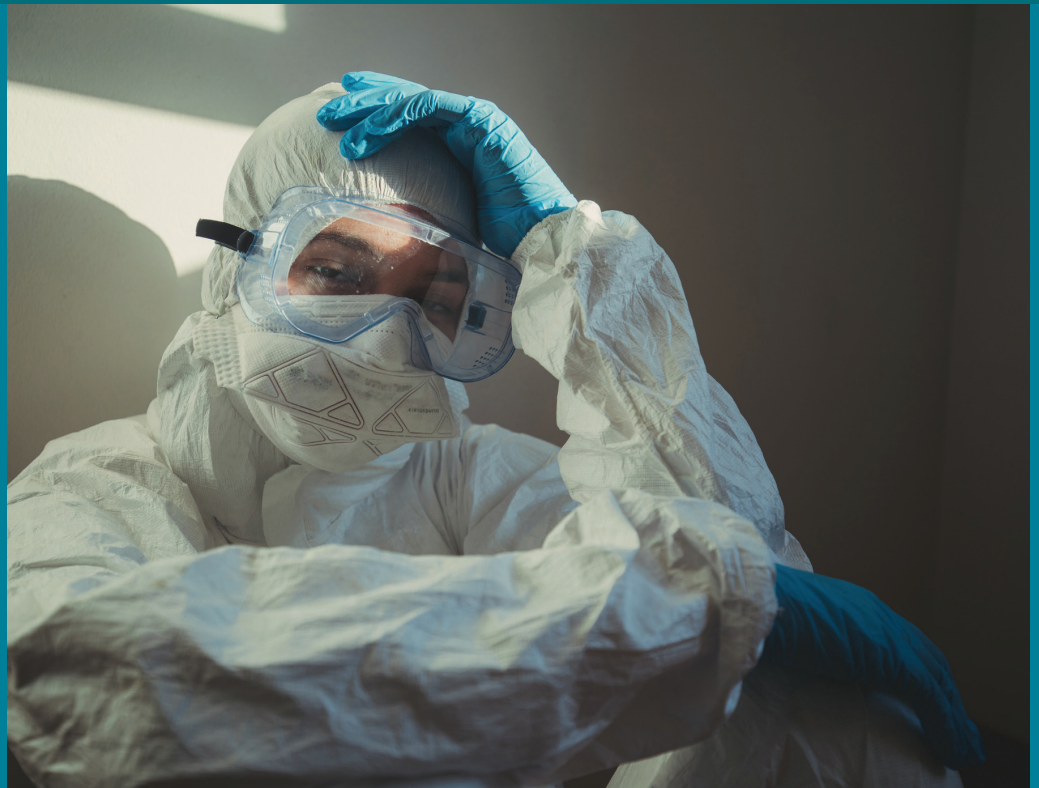

The mental health of frontline health care providers

Psychiatric training during a global pandemic

Digital mental health: the genie is out of the bottle

Racial justice: reforming law enforcement involvement in involuntary commitment

AMERICAN  
**PSYCHIATRIC**  
ASSOCIATION

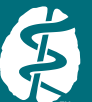

[ps.psychiatryonline.org](http://ps.psychiatryonline.org)
